# Supplementary material for: Towards a cyber-physical era: soft computing framework based multi-sensor array for water quality monitoring
Source: Copernicus journal article supplement (doi:10.5194/dwes-11-9-2018), 2018-02-05
Supplement: Supplementary file 5 [file dwes-11-9-2018-supplement.zip]

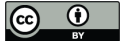

## *Supplement of*

# **Towards a cyber-physical era: soft computing framework based multi-sensor array for water quality monitoring**

**Jyotirmoy Bhardwaj et al.**

*Correspondence to:* Jyotirmoy Bhardwaj ([jyotirmoy.bhardwaj@gmail.com](mailto:jyotirmoy.bhardwaj@gmail.com))

- [dwes-11-9-2018-supplement-title-page.pdf](#)
- Supplementary Material
  - 1. Supplementary\_Material\_1.ino
  - 2. Supplementary\_Material\_2.pdf
  - 3. Supplementary\_Material\_3.pdf
  - 4. Supplementary\_Material\_4.pdf
  - 5. Supplementary\_material\_5.pdf .pdf
  - 6. Supplementary\_Material\_6.mp4
  - 7. Supplementary\_Material\_7.xlsx

The copyright of individual parts of the supplement might differ from the CC BY 4.0 License.
